# Supplementary material
Source: PubMed Central journal article supplement (PMC3870729)
Supplement: 1313620110_pnas.201313620SI.pdf [file 1313620110_pnas.201313620SI.pdf]

# Supporting Information

Tominaga et al. 10.1073/pnas.1313620110

## Materials and Methods

**Preparation and Crystallization of the Hydrogenase Pleiotropically Acting Protein in the Nucleotide-Bound States.** The overexpression and purification of hydrogenase pleiotropically acting protein (HypE) from *Thermococcus kodakarensis* (TkHypE) were performed as described previously (1). *Escherichia coli* cells producing TkHypE were sonicated on ice, and the supernatant after centrifugation ( $34,600 \times g$ , 30 min at 277 K) was subjected to heat treatment at 358 K for 15 min. After centrifugation ( $34,600 \times g$ , 30 min at 277 K), the supernatant was applied to an anion-exchange column (HiTrap Q HP; GE Healthcare) equilibrated with 50 mM Tris-HCl pH 8.0 and 1 mM DTT. Proteins were eluted with a linear gradient of NaCl from 0.15 to 0.5 M. The sample was then applied to a gel-filtration column (Superdex200 10/300 GL, GE Healthcare) equilibrated with 20 mM Tris-HCl pH 7.5, 150 mM NaCl, and 1 mM tris (2-carboxyethyl) phosphine (TCEP).

The protein sample for crystallization was concentrated to  $20 \text{ mg mL}^{-1}$  in 20 mM Mes-NaOH pH 6.0, 5 mM  $\text{MgCl}_2$ , and 1 mM TCEP. The sample was mixed with 10 mM KOCN and incubated for 4 h at room temperature or for 20 h at 277 K. Then, 5 mM adenosine 5'-( $\beta,\gamma$ -imido)triphosphate (AMPPNP) or 10 mM ATP was added. The sample with AMPPNP was incubated for 2 h at room temperature. The sample with ATP was immediately used for crystallization.

Crystallization was performed by the sitting-drop vapor-diffusion method at 293 K using 96-well Intelli-plates or CrystalClear D Strips (Hampton Research). Cluster crystals of HypE were

initially obtained using Crystal Screen Cryo (Hampton Research) condition 39 [0.085 M Hepes-NaOH pH 7.5, 1.7 M ammonium sulfate, 1.7% (vol/vol) polyethylene glycol 400, 15% (vol/vol) glycerol]. The crystallization condition was optimized by varying the pH and the concentration of ammonium sulfate and glycerol. Addition of the Additive Screen reagent 69 [20% (wt/vol) benzamidine hydrochloride] (Hampton Research) inhibited the cluster formation. Finally, crystals suitable for data collection were obtained using reservoir solution containing 0.1 M Mes-NaOH pH 6.0, 1.4–1.55 M ammonium sulfate, 1.7% (vol/vol) polyethylene glycol 400, and 6% (vol/vol) glycerol. Drops were prepared by mixing 1.0  $\mu\text{L}$  protein, 0.8  $\mu\text{L}$  reservoir solution, and 0.2  $\mu\text{L}$  of the additive screen reagent.

**Data Collection and Structure Determination.** Crystals were soaked in reservoir solution including 18% (vol/vol) glycerol for cryo-protection and then flash-cooled in a nitrogen stream at 100 K. The dataset “ATP pH7.0” was collected from a crystal grown in drops made by mixing the protein sample in 20 mM Hepes pH 7.0, 5 mM  $\text{MgCl}_2$ , 1 mM TCEP, 10 mM ATP, and the above described reservoir solution. Diffraction datasets were collected at the beamlines, BL-1A, BL-5A, and AR-NW12A (Photon Factory). All data were processed with *XDS* (2). The structures were determined by the molecular replacement method with *MOLREP* (3), using the previously determined HypE structure in its ternary complex (PDB entry 3VYT). The models were refined with the programs *CNS* (4), *Refmac5* (5), and *PHENIX* (6) and were validated with Molprobrity (7).

1. Arai T, et al. (2007) Crystallization and preliminary X-ray crystallographic study of [NiFe]-hydrogenase maturation factor HypE from *Thermococcus kodakarensis* KOD1. *Acta Crystallogr Sect F Struct Biol Cryst Commun* 63(Pt 9):765–767.
2. Kabsch W (2010) Xds. *Acta Crystallogr D Biol Crystallogr* 66(Pt 2):125–132.
3. Vagin A, Teplyakov A (2010) An approach to multi-copy search in molecular replacement. *Acta Crystallogr D Biol Crystallogr* 66(Pt 1):22–25.
4. Brünger AT, et al. (1998) Crystallography & NMR system: A new software suite for macromolecular structure determination. *Acta Crystallogr D Biol Crystallogr* 54(Pt 5): 905–921.

5. Murshudov GN, Vagin AA, Dodson EJ (1997) Refinement of macromolecular structures by the maximum-likelihood method. *Acta Crystallogr D Biol Crystallogr* 53(Pt 3): 240–255.
6. Adams PD, et al. (2010) PHENIX: a comprehensive Python-based system for macromolecular structure solution. *Acta Crystallogr D Biol Crystallogr* 66(Pt 2):213–221.
7. Chen VB, et al. (2010) MolProbrity: All-atom structure validation for macromolecular crystallography. *Acta Crystallogr D Biol Crystallogr* 66(Pt 1):12–21.

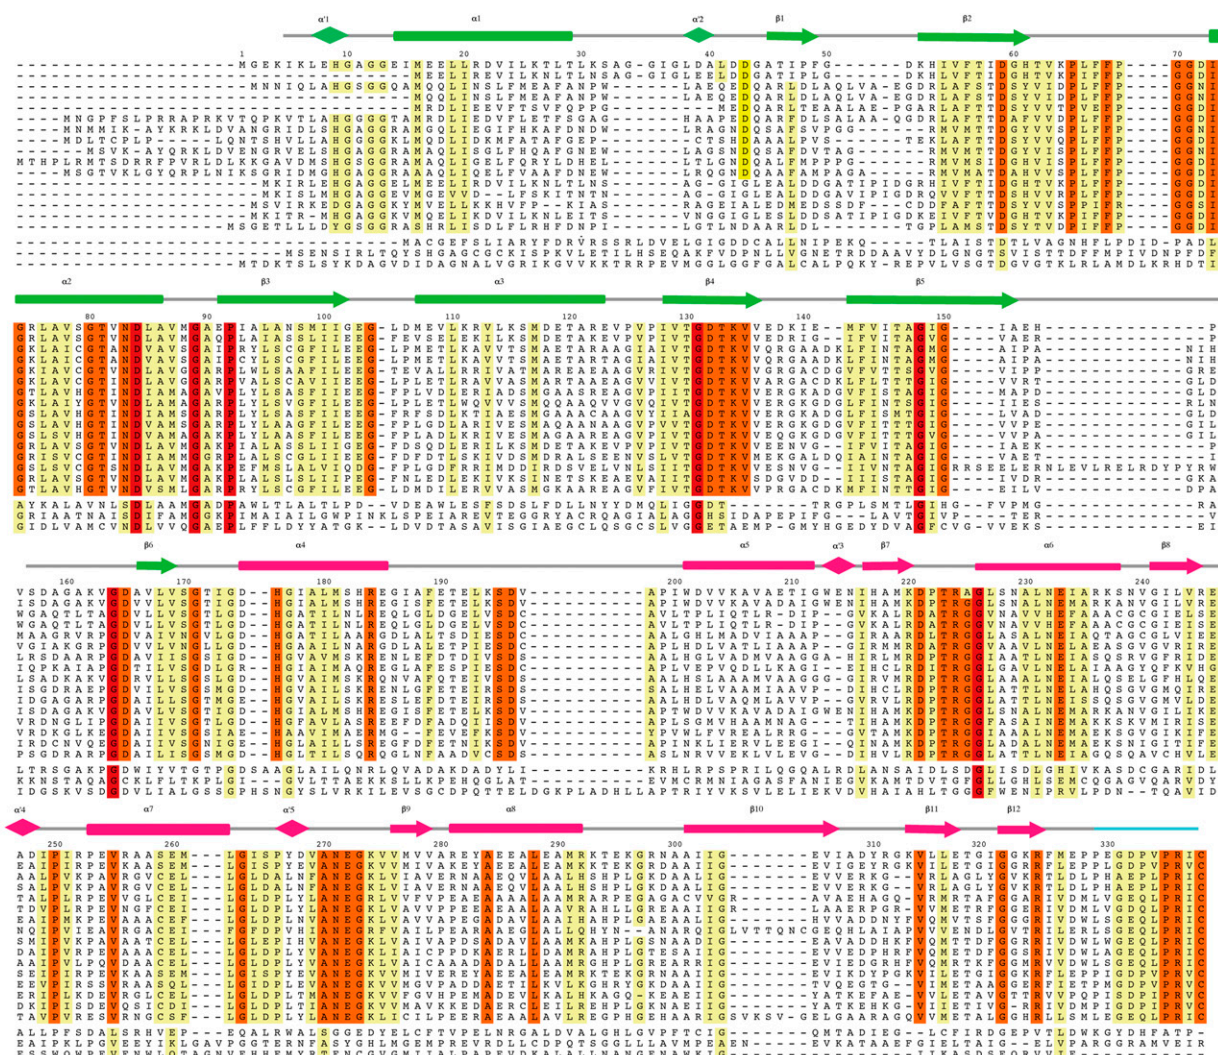

**Fig. S1.** Sequence alignment and secondary structure assignment of HypE proteins from *Thermococcus kodakarensis*, *Pyrococcus furiosus*, *E. coli*, *Shigella boydii*, *Rhodobacter capsulatus*, *Azorhizobium caulinodans*, *Rhizobium leguminosarum*, *Synechococcus* sp. PCC 7002, *Bradyrhizobium japonicum*, *Thiocapsa roseopersicina*, *Ralstonia eutropha*, *Pyrococcus abyssi*, *Methanospirillum hungatei*, *Archaeoglobus fulgidus*, *Methanocaldococcus jannaschii*, *Desulfurovibrio vulgaris*, and aminoimidazole ribonucleotide synthetase (PurM) family members: thiamin-monophosphate kinase (ThiL), selenophosphate synthase (SelD), and phosphoribosylaminoimidazole synthetase (PurM).

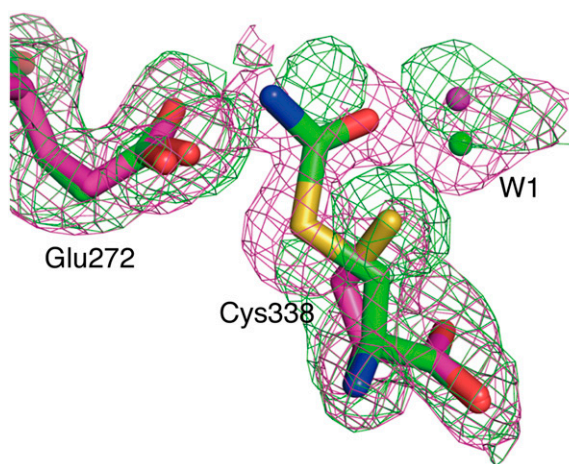

**Fig. S2.** Conformational changes surrounding Cys338 in the carbamoylated and unreacted states. Carbon atoms, W1, and  $F_0-F_c$  maps of carbamoylated and unreacted states are shown in green and magenta, respectively. The  $F_0-F_c$  maps are shown in mesh at  $2.5 \sigma$ .

**Table S1. Data collection and refinement statistics**

|                                                                        | AMPPNP                              | ATP                                 | ATP pH7.0                           |
|------------------------------------------------------------------------|-------------------------------------|-------------------------------------|-------------------------------------|
|                                                                        | <i>Data collection</i>              |                                     |                                     |
| Space group                                                            | <i>P4<sub>3</sub>2<sub>1</sub>2</i> | <i>P4<sub>3</sub>2<sub>1</sub>2</i> | <i>P4<sub>3</sub>2<sub>1</sub>2</i> |
| Cell dimensions                                                        |                                     |                                     |                                     |
| <i>a, b, c</i> (Å)                                                     | 102.9, 102.9, 104.0                 | 102.9, 102.9, 104.3                 | 102.4, 102.4, 105.5                 |
| Resolution (Å)*                                                        | 50–1.53 (1.63–1.53)                 | 50–1.64 (1.74–1.64)                 | 47–1.86 (1.98–1.86)                 |
| <i>R</i> <sub>sym</sub> (%) <sup>*†</sup>                              | 7.6 (60.9)                          | 6.7 (72.2)                          | 7.4 (66.6)                          |
| <i>I</i> /σ( <i>I</i> )                                                | 22.9 (5.2)                          | 27.7 (4.5)                          | 22.1 (4.5)                          |
| Completeness (%) <sup>*</sup>                                          | 99.6 (98.9)                         | 99.8 (99.6)                         | 99.6 (98.0)                         |
|                                                                        | <i>Refinement</i>                   |                                     |                                     |
| Resolution (Å)                                                         | 42–1.53                             | 42–1.64                             | 47–1.86                             |
| No. reflections                                                        | 83,607                              | 68,178                              | 47,503                              |
| <i>R</i> <sub>work</sub> / <i>R</i> <sub>free</sub> (%) <sup>‡,§</sup> | 17.0/18.4                           | 17.5/19.6                           | 17.3/20.0                           |
| Rms deviations                                                         |                                     |                                     |                                     |
| Bond length (Å)                                                        | 0.06                                | 0.08                                | 0.008                               |
| Bond angles (°)                                                        | 1.18                                | 1.18                                | 1.13                                |
| Ramachandran plot                                                      |                                     |                                     |                                     |
| Preferred regions                                                      | 97.5                                | 98.3                                | 97.6                                |
| Allowed regions                                                        | 1.9                                 | 1.1                                 | 1.8                                 |
| Outliers                                                               | 0.6                                 | 0.6                                 | 0.6                                 |

\*Values in parentheses are for the high-resolution shell.

<sup>†</sup> $R_{\text{sym}} = \sum |I_h - \langle I_h \rangle| / \sum I_h$ , where  $I_h$  is the observed intensity and  $\langle I_h \rangle$  is the average intensity over symmetry-equivalent measurements.

<sup>‡</sup> $R_{\text{work}} = \sum |F_o - F_c| / \sum |F_o|$ , where  $F_c$  is calculated structure factor.

<sup>§</sup> $R_{\text{free}}$  is the same as  $R_{\text{work}}$ , but calculated for 5% of randomly chosen reflections that were omitted in the refinement.
